# Supplementary material
Source: PubMed Central journal article supplement (PMC4128527)
Supplement: crj-21-93-s1.pdf [file crj-21-93-s1.pdf]

# Canadian Critical Care Trainees Network (CCCTN)

Réseaucanadien des fellows en soins  
intensifs (RCFSI)

---

## CONSENT

This survey is conducted in collaboration with the Canadian Critical Care Society and the Canadian Critical Care Trials Group. Before agreeing to participate, please take time to read and understand the following instructions. This explains the objectives of this project, its advantages, risks and inconveniences.

**Objectives:** The objectives of this survey are to:1) Understand the career goals of the critical care fellows;2) Identify the type of support they need to achieve their goals in terms of clinical work, research, teaching, administration/management;3) Define how a Canadian Critical Care Trainees Network can support the Canadian critical care fellows (mission and activities) and;4) Determine if the critical care fellows feel there is a need for a Canadian Critical Care Fellows Network.

**Possible advantages, risks or inconveniences related to your participation:** Your participation will help in the development of a Canadian Critical Care Fellows Network that will meet Canadian critical care fellows' needs. This will also help to understand the fellows' career goals, so resources can be organized in a way to help them achieve it. Of course, this requires a few minutes of your time, which we know is very precious. You may withdraw your participation without negative consequences or prejudice and without having to justifying your decision. If you decide to withdraw, it is important to inform the contact person (see below, we will need your IP address). All the data concerning you will then be destroyed.

**Confidentiality and data management:** All the data will be anonymized and preserved for a period of two years, after which they will be destroyed. This survey may be published in scientific reviews, but no participant will be identified or acknowledged.

## CONSENTEMENT

Ce sondage est conduit en collaboration avec la "Canadian Critical Care Society" et le "Canadian Critical Care Trials Group". Avant d'accepter de participer, svp prenez le temps de lire et comprendre les instructions suivantes. Ce qui suit détaille les objectifs, les avantages, les risques et les inconvénients de ce sondage.

Objectifs: Les objectifs visés par ce sondage sont de: 1) Comprendre les objectifs de carrières des fellows en soins intensifs; 2) Identifier le type de soutien requis permettant d'atteindre ces objectifs en termes de travail clinique, de recherche, d'enseignement, d'administration/gestion; 3) Définir comment un Réseau canadien de fellows en soins intensifs peut supporter les fellows canadiens en soins intensifs et; 4) Déterminer si les fellows en soins intensifs ont l'impression qu'il y a un besoin pour un Réseau canadien de fellows en soins intensifs.

Avantages, risques ou inconvénients possibles reliés à votre participation: Votre participation aidera à développer un Réseau canadien de fellows en soins intensifs qui répondra aux besoins de ces derniers. Ce sondage permettra aussi de comprendre les objectifs de carrière des fellows de sorte que les ressources pourront être organisées de manière à aider les fellows à les atteindre. Bien entendu, ceci nécessite quelques minutes de votre temps que nous savons précieux. Vous pouvez retirer votre participation à tout moment sans conséquence négative ou préjudice and ce, sans avoir à fournir de justification. Si vous décidez de vous retirer, il est important d'en informer la personne contact (voir ci-bas, nous aurons besoin de votre adresse IP). Toutes vos données seront alors détruites.

Confidentialité et gestion des données: Toutes les données seront dénominalisées et préservées pour une période de 2 ans après laquelle elles seront détruites. Les résultats de ce sondage pourraient être publiés dans une revue scientifique, mais aucun participant ne pourra être identifié.

**Additional information: If you have questions concerning this survey or the implications of your participation, please contact Maude St-Onge at [egnomie@hotmail.com](mailto:egnomie@hotmail.com) or [StongeM@smh.ca](mailto:StongeM@smh.ca).**

**Acknowledgements: Your collaboration is vital for us to be able to conduct this study and we thank you for participating. IF YOU AGREE TO PARTICIPATE, PLEASE SELECT "YES".**

**Information additionnelle: Si vous avez des questions concernant ce projet ou les implications de votre participation, svp contactez: Maude St-Onge à [egnomie@hotmail.com](mailto:egnomie@hotmail.com) ou [StongeM@smh.ca](mailto:StongeM@smh.ca).**

**Remerciements: Votre collaboration est vitale pour la conduite de ce sondage et nous remercions de votre participation.**

**SI VOUS CONSENTEZ À PARTICIPER, SVP SÉLECTIONNEZ "YES" ("OUI").**

- Yes
- No

**1) What is (are) your citizenship(s)? / Quelle est votre ou quelles sont vos citoyenneté(s)?**

- Canadian / canadienne
- Other(s) / autre(s) \_\_\_\_\_

**2) In which province do you live at the moment? / Dans quelle province habitez-vous actuellement?**

- Province
- Alberta
  - British Columbia / Colombie-Britannique
  - Manitoba
  - New Brunswick / Nouveau-Brunswick
  - Newfoundland and Labrador / Terre-Neuve et Labrador
  - Northwest Territories / Territoires du Nord-Ouest
  - Nova Scotia / Nouvelle-Écosse
  - Nunavut
  - Ontario
  - Prince Edward Island / Île-du-Prince-Édouard
  - Quebec / Québec
  - Saskatchewan
  - Yukon

**3) Are you in an adult or a pediatric Critical Care Medicine program? / Êtes-vous dans un programme de soins intensifs adulte ou pédiatrique?**

- Adult vs pediatrics / adulte vs pédiatrique
- Adult / adulte
  - Pediatrics / pédiatrique

**4) In which residency program were you before beginning Critical Care Medicine? / Dans quel programme de résidence étiez-vous avant de débiter les soins intensifs?**

- Background / parcours
- Anesthesia / anesthésie
  - Cardiology / cardiologie
  - Emergency Medicine / médecine d'urgence
  - Gastroenterology / gastro-entérologie
  - General Internal Medicine / médecine interne
  - General Surgery / chirurgie générale
  - Hematology / hématologie
  - Infectious Diseases / maladies infectieuses
  - Nephrology / néphrologie
  - Neurology / neurologie
  - Neurosurgery / neurochirurgie
  - Pediatrics / pédiatrie
  - Respiriology / pneumologie
  - Thoracic Surgery / chirurgie thoracique
  - Trauma / traumatologie
  - Other

**5) Are you in the first or the second year of the Critical Care Medicine program? / Êtes-vous dans la première ou la deuxième année du programme de soins intensifs?**

- First or second year / première ou deuxième année
- First year / première année
  - Second year / deuxième année

**6) Do you plan for another training after Critical Care Medicine? If yes, which one? / Débuterez-vous un autre programme après avoir complété celui en soins intensifs? Si oui, lequel?**

- No
- Yes \_\_\_\_\_

**7) In which province do you expect practicing critical care medicine? / Dans quelle province pensez-vous pratiquer les soins intensifs?**

- Province
- Alberta
  - British Columbia / Colombie-Britannique
  - Manitoba
  - New Brunswick / Nouveau-Brunswick
  - Newfoundland and Labrador / Terre-Neuve et Labrador
  - Northwest Territories / Territoires du Nord-Ouest
  - Nova Scotia / Nouvelle-Écosse
  - Nunavut
  - Ontario
  - Prince Edward Island / Île-du-Prince-Édouard
  - Quebec / Québec
  - Saskatchewan
  - Yukon

**8) What type of critical care medicine practice are you expecting to do at the end of your training? / Quel type de pratique en soins intensifs vous attendez-vous à faire à la fin de votre formation?**

- Career expectations / Attentes relatives à la carrière
- Academic / académique
  - Non-academic / non-académique
  - Both academic and non-academic / Académique et non-académique
  - Will not practice critical care medicine / Ne pratiquerai pas en soins intensifs

**9) Which proportion of your future practice in critical care do you expect to spend for the following activities? / Quelle proportion de votre future pratique en soins intensifs vous attendez-vous à passer pour ces types d'activités?**

- |                                | 0%                    | 1-25%                 | 26-50%                | 51-75%                | 76-99%                | 100%                  |
|--------------------------------|-----------------------|-----------------------|-----------------------|-----------------------|-----------------------|-----------------------|
| Clinical (CCM) / Clinique (SI) | <input type="radio"/> |

|                                                                                             |                       |                       |                       |                       |                       |                       |
|---------------------------------------------------------------------------------------------|-----------------------|-----------------------|-----------------------|-----------------------|-----------------------|-----------------------|
| Clinical (other than CCM) / Clinique (autre que SI)                                         | <input type="radio"/> |
| Teaching (CCM) / Enseignement (SI)                                                          | <input type="radio"/> |
| Teaching (other than CCM) / Enseignement (autre que SI)                                     | <input type="radio"/> |
| Research (CCM) / Recherche (SI)                                                             | <input type="radio"/> |
| Research (other than CCM) / Recherche (autre que SI)                                        | <input type="radio"/> |
| Administration or management (CCM) /<br>Administration ou gestion (SI)                      | <input type="radio"/> |
| Administration or management (other than CCM) /<br>Administration ou gestion (autre que SI) | <input type="radio"/> |

### 10) How would you evaluate your chances of...? / Comment évalueriez-vous vos chances de...?

|                                                                                            | 0%                    | 1-25%                 | 26-50%                | 51-75%                | 76-99%                | 100%                  |
|--------------------------------------------------------------------------------------------|-----------------------|-----------------------|-----------------------|-----------------------|-----------------------|-----------------------|
| Getting a job as a physician / Obtenir un emploi comme médecin                             | <input type="radio"/> |
| Getting a job as a critical care physician / Obtenir un emploi comme intensiviste          | <input type="radio"/> |
| Getting the type of job you are looking for / Obtenir le type d'emploi que vous recherchez | <input type="radio"/> |

### 11) How would you evaluate...? / Comment évalueriez-vous...?

|                                                                                                                                                                                  | None / nul            | Poor / pauvre         | Fair / acceptable     | Good / bon            | Excellent / excellent |
|----------------------------------------------------------------------------------------------------------------------------------------------------------------------------------|-----------------------|-----------------------|-----------------------|-----------------------|-----------------------|
| The support you received to help you find a CLINICAL job in critical care / Le soutien que vous avez reçu pour vous trouver un emploi CLINIQUE en soins intensifs                | <input type="radio"/> |
| The support you received to help you develop a TEACHING career in critical care / Le soutien que vous avez reçu pour développer une carrière en ENSEIGNEMENT des soins intensifs | <input type="radio"/> |



The support you received to help you develop a RESEARCH career in critical care / Le soutien que vous avez reçu pour développer une carrière en RECHERCHE en soins intensifs

The support you received to help you develop an ADMINISTRATIVE OR MANAGER career in critical care / Le soutien que vous avez reçu pour développer une carrière en ADMINISTRATION OU GESTION en soins intensifs

Your capacity to find a CLINICAL job in critical care without support / Votre capacité à trouver un emploi CLINIQUE en soins intensifs sans soutien

Your capacity to develop a TEACHING career in critical care without support / Votre capacité à développer une carrière en ENSEIGNEMENT des soins intensifs sans soutien

Your capacity to develop a RESEARCH career in critical care without support / Votre capacité à développer une carrière en RECHERCHE en soins intensifs sans soutien

Your capacity to develop an ADMINISTRATIVE OR MANAGER career in critical care without support / Votre capacité à développer une carrière en ADMINISTRATION OU GESTION des soins intensifs sans soutien

**12) What barriers prevent you from finding a CLINICAL job in critical care?/  
Quelles barrières vous empêchent de vous trouver une emploi CLINIQUE en soins intensifs?**

13) What helps you to find a CLINICAL job in critical care? /Qu'est-ce qui vous aide à trouver un emploi CLINIQUE en soins intensifs?

14) What else would help you to find a CLINICAL job in critical care? /Quoi d'autre pourrait vous aider à trouver un emploi CLINIQUE en soins intensifs?

15) What barriers prevent you from developing a TEACHING career in critical care? /Quelles barrières vous empêchent de développer une carrière en ENSEIGNEMENT en soins intensifs?

16) What helps you developing a TEACHING career in critical care? /Qu'est-ce qui vous aide à développer une carrière en ENSEIGNEMENT des soins intensifs?

17) What else would help you to develop a TEACHING career in critical care? /Quoi d'autre pourrait vous aider à développer une carrière en ENSEIGNEMENT en soins intensifs?

18) What barriers prevent you from developing a RESEARCH career in critical care? /Quelles barrières vous empêchent de développer une carrière en RECHERCHE en soins intensifs?

19) What helps you developing a RESEARCH career in critical care?/Qu'est-ce qui vousaide à développer une carrière en RECHERCHE des soins intensifs?

20) What else would help you to develop a RESEARCH career in critical care?/Quoi d'autrepourraitvous aider à développer une carrière en RECHERCHE en soins intensifs?

21) What barriers prevent you from developing a ADMINISTRATIVE OR MANAGER career in critical care?/Quellesbarrières vousempêchent de développer une carrière en ADMINISTRATION OU GESTION en soins intensifs?

22) What helps you developing an ADMINISTRATIVE OR MANAGER career in critical care?/Qu'est-ce qui vousaide à développer une carrière en ADMINISTRATION OU GESTION des soins intensifs?

23) What else would help you to develop an ADMINISTRATIVE OR MANAGER career in critical care?/Quoi d'autrepourraitvous aider à développer une carrière en ADMINISTRATION OU GESTION en soins intensifs?

24) How would you evaluate...? /Comment évalueriez-vous...?

|                                                                                                                                                   | None<br>/ nul         | Poor /<br>faible      | Fair /<br>acceptable  | Good /<br>bonne       | Excellent<br>/ excellent |
|---------------------------------------------------------------------------------------------------------------------------------------------------|-----------------------|-----------------------|-----------------------|-----------------------|--------------------------|
| What you know about what other Canadian CCM programs do / Ce que vous savez en ce qui a trait à ce que les autres programmes de SI canadiens font | <input type="radio"/>    |

What you know about who the other Canadian CCM fellows are / Ce que vous savez en ce qui a trait à qui sont les autres fellows canadiens en SI

What do you know about national or international training and conferences in critical care that are offered / Ce que vous savez en ce qui a trait aux formations et aux conférences nationales ou internationales offertes en soins intensifs

**25) If we create a Canadian Critical Care Fellows Network, I think the mission should include... / Si nous créons un Réseau canadien des fellows en soins intensifs, je crois que la mission devrait inclure...**

|            |            |         |           |         |
|------------|------------|---------|-----------|---------|
| 1 =        | 2 =        | 3 =     | 4 =       | 5 =     |
| Disagree / | Somewhat   | Neutral | Somewhat  | Agree / |
| En         | disagree / | /       | agree /   | En      |
| désaccord  | Plutôt en  | Neutre  | Plutôt en | accord  |
|            | désaccord  |         | accord    |         |

Promoting and enhancing Critical Care Medicine in Canada / Promouvoir et renforcer la médecine de soins intensifs au Canada

Promoting and facilitating fellows' involvement in the CARE of critical care patients / Promouvoir et faciliter l'implication des fellows dans le SOINS des patients critiquement malades

Promoting and facilitating fellows' involvement in critical care EDUCATION / Promouvoir et faciliter l'implication des fellows dans l'ENSEIGNEMENT des soins intensifs

Promoting and facilitating

fellows' involvement in critical care RESEARCH / Promouvoir et faciliter l'implication des fellows dans la RECHERCHE aux soins intensifs

Promoting and facilitating fellows' involvement in critical care ADMINISTRATION AND MANAGEMENT / Promouvoir et faciliter l'implication des fellows dans l'ADMINISTRATION ET GESTION des soins intensifs

○            ○            ○            ○            ○

Promoting and facilitating fellows' involvement in NATIONAL critical care initiatives / Promouvoir et faciliter l'implication des fellows au sein d'initiatives NATIONALES

○            ○            ○            ○            ○

Promoting and facilitating fellows' involvement in INTERNATIONAL critical care initiatives / Promouvoir et faciliter l'implication des fellows au sein d'initiatives INTERNATIONALES

○            ○            ○            ○            ○

**26) If we create a Canadian Critical Care Fellows Network, I think the mission should also include... /Si nous créons un Réseau canadien des fellows en soins intensifs, je crois que la mission devrait inclure aussi...**

**27) If we create a Canadian Critical Care Fellows Network, I think that the activities of the group should include... /Si nous créons un Réseau canadien des fellows en soins intensifs, je crois que les activités du groupe devraient inclure...**

1 =            2 =            3 =            4 =            5 =  
Disagree /    Somewhat    Neutral      Somewhat    Agree /

|                                                                                                                                                                                                                                                                                                                        | En<br>désaccord       | disagree /<br>Plutôt en<br>désaccord | /<br>Neutre           | agree /<br>Plutôt en<br>accord | En<br>accord          |
|------------------------------------------------------------------------------------------------------------------------------------------------------------------------------------------------------------------------------------------------------------------------------------------------------------------------|-----------------------|--------------------------------------|-----------------------|--------------------------------|-----------------------|
| Activities related to fellows well being / Activités reliées au bien-être des fellows                                                                                                                                                                                                                                  | <input type="radio"/> | <input type="radio"/>                | <input type="radio"/> | <input type="radio"/>          | <input type="radio"/> |
| Social activities / Activités sociales                                                                                                                                                                                                                                                                                 | <input type="radio"/> | <input type="radio"/>                | <input type="radio"/> | <input type="radio"/>          | <input type="radio"/> |
| Support for job finding / Soutien à la recherche d'emploi                                                                                                                                                                                                                                                              | <input type="radio"/> | <input type="radio"/>                | <input type="radio"/> | <input type="radio"/>          | <input type="radio"/> |
| Support for CCM exam preparation / Soutien à la préparation aux examens de soins intensifs                                                                                                                                                                                                                             | <input type="radio"/> | <input type="radio"/>                | <input type="radio"/> | <input type="radio"/>          | <input type="radio"/> |
| Promoting CCM training and conferences / Faire la promotion des formations et conférences en soins intensifs                                                                                                                                                                                                           | <input type="radio"/> | <input type="radio"/>                | <input type="radio"/> | <input type="radio"/>          | <input type="radio"/> |
| Promoting national and international electives opportunities / Faire la promotion des opportunités de stages nationaux et internationaux                                                                                                                                                                               | <input type="radio"/> | <input type="radio"/>                | <input type="radio"/> | <input type="radio"/>          | <input type="radio"/> |
| Promoting national and international education opportunities / Faire la promotion des opportunités nationales et internationales en enseignement                                                                                                                                                                       | <input type="radio"/> | <input type="radio"/>                | <input type="radio"/> | <input type="radio"/>          | <input type="radio"/> |
| Promoting national and international research opportunities / Faire la promotion des opportunités nationales et internationales en recherche                                                                                                                                                                           | <input type="radio"/> | <input type="radio"/>                | <input type="radio"/> | <input type="radio"/>          | <input type="radio"/> |
| Promoting national and international project opportunities (network, conferences, meetings, quality improvement initiatives, etc.) / Faire la promotion des opportunités de projets nationaux et internationaux (réseaux, conférences, rencontres, initiatives reliées à l'amélioration de la qualité des soins, etc.) | <input type="radio"/> | <input type="radio"/>                | <input type="radio"/> | <input type="radio"/>          | <input type="radio"/> |

|                                                                                                                                                                                                                                                                                                                                        |                       |                       |                       |                       |                       |
|----------------------------------------------------------------------------------------------------------------------------------------------------------------------------------------------------------------------------------------------------------------------------------------------------------------------------------------|-----------------------|-----------------------|-----------------------|-----------------------|-----------------------|
| Advocating for fellows' involvement in research, education, administrative and management opportunities / Militer pour l'implication des fellows dans les activités reliées à la recherche, l'éducation, l'administration et la gestion                                                                                                | <input type="radio"/> |
| Advocating for fellows' involvement at the Royal College of Physicians and Surgeons of Canada / Militer pour l'implication des fellows au sein du Collège Royal des Médecins et Chirurgiens du Canada                                                                                                                                  | <input type="radio"/> |
| Advocating for fellows' involvement at the Canadian Critical Care Society / Militer pour l'implication des fellows au sein de la Société Canadienne de Soins Intensifs                                                                                                                                                                 | <input type="radio"/> |
| Advocating for fellows' involvement at the Canadian Critical Care Trials Group / Militer pour l'implication des fellows au sein du "Canadian Critical Care Trials Group"                                                                                                                                                               | <input type="radio"/> |
| Advocating for fellows' involvement in peer reviewed journals / Militer pour l'implication des fellows au seins des journaux revus par les pairs                                                                                                                                                                                       | <input type="radio"/> |
| Fund raising for supporting fellows' research, abstract presentations, presentations at national and international conferences, etc. / Levée de fonds pour supporter certaines activités des fellows telles les recherches, les présentations de résumés, les présentations à des conférences nationales et internationales ou autres. | <input type="radio"/> |

Offering mentorship (first year with second year or fellows with attendings)

Networking via listserv, twitter, etc. / Activités de réseautage via des listes de courriels, twitter, etc.

**28) If we create a Canadian Critical Care Fellows Network, I think that the activities of the group should also include... /Si nous créons un Réseau canadien des fellows en soins intensifs, je crois que les activités du groupe devraient aussi inclure...**

**29) Canadian Critical Care Trainees Network (CCCTN) /Réseau canadien des fellows en soins intensifs (RCFSI)**

|                               |                                                  |                        |                                            |                         |
|-------------------------------|--------------------------------------------------|------------------------|--------------------------------------------|-------------------------|
| 1 =                           | 2 =                                              | 3 =                    | 4 =                                        | 5 =                     |
| Disagree /<br>En<br>désaccord | Somewhat<br>disagree /<br>Plutôt en<br>désaccord | Neutral<br>/<br>Neutre | Somewhat<br>agree /<br>Plutôt en<br>accord | Agree /<br>En<br>accord |

I think we should create a Canadian Critical Care Fellows Network (CCCFN) / Je crois que nous devrions créer un Réseau canadien des fellows en soins intensifs (RCFSI)

I think all fellows should be systematically members of the Canadian Critical Care Fellows Network (CCCFN) / Je crois que tous les fellows devraient systématiquement être membres du Réseau canadien des fellows en soins intensifs (RCFSI)



**30) Are you interested in being a member (free) of the Canadian Critical Care Trainees Network (CCCTN)? If yes, please leave your email address and phone number or write an email at : [egnomie@gmail.com](mailto:egnomie@gmail.com). / Êtes-vous intéressé à être membre (gratuit) du Réseau canadien des fellows en soins intensifs (RCFSI)? Si oui, svp inscrivez votre adresse courriel et numéro de téléphone ou écrivez un courriel à [egnomie@gmail.com](mailto:egnomie@gmail.com).**

- No  
 Yes \_\_\_\_\_

**31) Are you interested in getting involved in the development of the Canadian Critical Care Fellows Network (CCCFN)? If yes, please leave your email address and phone number or write an email at : [egnomie@gmail.com](mailto:egnomie@gmail.com). / Êtes-vous intéressé à être impliqué dans le développement du Réseau canadien des fellows en soins intensifs (RCFSI)? Si oui, svp inscrivez votre adresse courriel et numéro de téléphone ou écrivez un courriel à [egnomie@gmail.com](mailto:egnomie@gmail.com).**

- No  
 Yes \_\_\_\_\_

**32) Are you interested in getting involved in the Canadian Critical Care Society? If yes, please leave your email address and phone number or write an email at : [egnomie@gmail.com](mailto:egnomie@gmail.com). Indicate which of those areas are interesting you: training standards, maintenance of competence, research, education, advocacy, knowledge translation, communication. / Êtes-vous intéressé à être impliqué au sein de la Société canadienne de soins intensifs? Si oui, svp inscrivez votre adresse courriel et numéro de téléphone ou écrivez un courriel à [egnomie@gmail.com](mailto:egnomie@gmail.com). Indiquez quels domaines vous intéressent: standards de formation, maintien des compétences, recherche, éducation, promotion des soins intensifs, transmission des connaissances, communication.**

- No  
 Yes \_\_\_\_\_

**33) Are you interested in getting involved in the Canadian Critical Care Trials Group? If yes, please leave your email address and phone number or write an email at : [egnomie@gmail.com](mailto:egnomie@gmail.com). Indicate which of those areas are interesting you: education, knowledge translation, ethics, website, grant and manuscript review./Êtes-vous intéressé à être impliqué au sein de la Société canadienne de soins intensifs? Si oui, svp inscrivez votre adresse courriel et numéro de téléphone ou écrivez un courriel à [egnomie@gmail.com](mailto:egnomie@gmail.com). Indiquez quels domaines vous intéressent: éducation, transmission des connaissances, éthique, site web, révision des demandes de subventions et des manuscrits.**

- No
- Yes \_\_\_\_\_

**34) Comments or suggestions?/Commentaires ou suggestions?**

## APPENDIX 2

## Barriers and facilitators to achieve a career in each area

|                 | Barriers (%)                                                                                                                                                                                                                                                                | Facilitators (%)                                                                                                                                                                                                                                                                                                                                                              | Suggestions (%)                                                                                                                                                                                                                                                                                                                                                                                                                                                                                                                                                                                                 |
|-----------------|-----------------------------------------------------------------------------------------------------------------------------------------------------------------------------------------------------------------------------------------------------------------------------|-------------------------------------------------------------------------------------------------------------------------------------------------------------------------------------------------------------------------------------------------------------------------------------------------------------------------------------------------------------------------------|-----------------------------------------------------------------------------------------------------------------------------------------------------------------------------------------------------------------------------------------------------------------------------------------------------------------------------------------------------------------------------------------------------------------------------------------------------------------------------------------------------------------------------------------------------------------------------------------------------------------|
| <b>Clinical</b> | <ul style="list-style-type: none"> <li>-Lack of jobs (57)</li> <li>-No official critical care positions (1)</li> <li>-Partner location requirements (1)</li> <li>-Need for multiple advanced degrees (1)</li> <li>-Lack of knowledge about job opportunities (1)</li> </ul> | <ul style="list-style-type: none"> <li>-Contacts, networking (25)</li> <li>-Unique clinical expertise or additional training (15)</li> <li>-Support from CCM program director, department (9)</li> <li>-Mentors advices/support (3)</li> <li>-Electives where there are job opportunities (1)</li> <li>-Knowing the process, learning from others' experiences (1)</li> </ul> | <ul style="list-style-type: none"> <li>-Create a centralized database of positions available (12)</li> <li>-Advocate for official critical care positions or the possibility to share a "PREM" in Quebec (12)</li> <li>-Create a network (3)</li> <li>-Advocate for more closed critical care units managed by intensivists (3)</li> <li>- Encourage advanced planning for future needs and disclosure to the trainees (3)</li> <li>-Advocate for an increase retirement rate and more job sharing (3)</li> <li>-Mentorship program geared toward employment (1)</li> <li>-Train fewer residents (1)</li> </ul> |

|                 |                                                                                                                                                                                                                                                                                                                                                                                        |                                                                                                                                                                                                                                                                                                                                                                                                                                        |                                                                                                                                                                                                                                                                                                                                                                                        |
|-----------------|----------------------------------------------------------------------------------------------------------------------------------------------------------------------------------------------------------------------------------------------------------------------------------------------------------------------------------------------------------------------------------------|----------------------------------------------------------------------------------------------------------------------------------------------------------------------------------------------------------------------------------------------------------------------------------------------------------------------------------------------------------------------------------------------------------------------------------------|----------------------------------------------------------------------------------------------------------------------------------------------------------------------------------------------------------------------------------------------------------------------------------------------------------------------------------------------------------------------------------------|
| <b>Teaching</b> | <ul style="list-style-type: none"> <li>-Lack of positions that include teaching, academic jobs (19)</li> <li>-Lack of time or protected time (16)</li> <li>-No training (3)</li> <li>-No experience (3)</li> <li>-Need for advanced degrees (1)</li> <li>-Lack of colleagues' support (1)</li> <li>-Lack of interest (1)</li> <li>-No role model (1)</li> </ul>                        | <ul style="list-style-type: none"> <li>-Opportunities for teaching during the critical care training (13)</li> <li>-Training (10)</li> <li>-Motivation, interest (6)</li> <li>-University affiliation, support (6)</li> <li>-Contacts, networking (6)</li> <li>-Support from the critical care program director, department (4)</li> <li>-Mentors (3)</li> <li>-Access to simulation centers (1)</li> <li>-Publications (1)</li> </ul> | <ul style="list-style-type: none"> <li>-Develop a formal teaching training (15)</li> <li>-Identify a list of mentors to contact early (6)</li> <li>-Advocate for more opportunities for teaching, include interested non-academic physicians (3)</li> <li>-Integrate teaching tasks in the critical care curriculum (1)</li> <li>-Offer interesting salary for teaching (1)</li> </ul> |
| <b>Research</b> | <ul style="list-style-type: none"> <li>-Lack of funding, resources (12)</li> <li>-Lack of protected time during training (12)</li> <li>-Lack of motivation, interest (10)</li> <li>-Lack of protected time in available positions (9)</li> <li>-Lack of support (6)</li> <li>-Lack of training (1)</li> <li>-Lack of experience (1)</li> <li>-Need for advanced degrees (1)</li> </ul> | <ul style="list-style-type: none"> <li>-Good role models, mentors (16)</li> <li>-More research rotations (9)</li> <li>-Motivation, interest (7)</li> <li>-Identified priority by the program, the institution (6)</li> <li>-More research training (4)</li> <li>-Access to research platform (1)</li> <li>-Early exposures to ongoing projects (1)</li> <li>-Clinician Investigator Program (1)</li> </ul>                             | <ul style="list-style-type: none"> <li>-Favor access to more critical care research programs, institutions and platform (10)</li> <li>-Advocate for more protected research time during the training and in different positions (9)</li> <li>-Identify a list of mentors to contact early (7)</li> <li>-Advocate for more opportunities for funding or paid positions (7)</li> </ul>   |

|                       |                                                                                                                                                                                                                                                                                     |                                                                                                                                                                                                                                                                             |                                                                                                                                                                                                                                                                         |
|-----------------------|-------------------------------------------------------------------------------------------------------------------------------------------------------------------------------------------------------------------------------------------------------------------------------------|-----------------------------------------------------------------------------------------------------------------------------------------------------------------------------------------------------------------------------------------------------------------------------|-------------------------------------------------------------------------------------------------------------------------------------------------------------------------------------------------------------------------------------------------------------------------|
| <b>Administration</b> | <ul style="list-style-type: none"> <li>-No training, no administrative roles for trainees (15)</li> <li>-Lack of experience, experienced physicians have more credibility (12)</li> <li>-Lack of time (9)</li> <li>-Lack of interest (9)</li> <li>-Complex hierarchy (1)</li> </ul> | <ul style="list-style-type: none"> <li>-Good role models, mentors (6)</li> <li>-Training (6)</li> <li>-Background in administration (6)</li> <li>-Experience (3)</li> <li>-Desire to contribute to change and development (1)</li> <li>-Motivation, interest (1)</li> </ul> | <ul style="list-style-type: none"> <li>-Develop more workshops, courses and training (12)</li> <li>-Advocate for more opportunities to get involved in committees and administrative duties (10)</li> <li>-Advocate for protected time in administration (4)</li> </ul> |
|-----------------------|-------------------------------------------------------------------------------------------------------------------------------------------------------------------------------------------------------------------------------------------------------------------------------------|-----------------------------------------------------------------------------------------------------------------------------------------------------------------------------------------------------------------------------------------------------------------------------|-------------------------------------------------------------------------------------------------------------------------------------------------------------------------------------------------------------------------------------------------------------------------|
